# Supplementary material
Source: publisher site journal article supplement (https://www.dovepress.com/get_supplementary_file.php?f=398199.docx)
Supplement: Supplementary file 1 [file get_supplementary_file.php]

**Table S1. Oligonucleotide sets used for short hairpin RNAs, or primers.**

| Gene | Forward primer | Reverse primer |
| --- | --- | --- |
| circHECTD1 | CCTGGATTGGAAATGGCGAG | GGATCAAGAGGCCAAGTTGC |
| lin-HECTD1 | GAATGTAATGAGCCCAAAG | TAGGCAAATTGTGACCAAC |
| EZH2 | CAGCCTTGTGACAGTTCGT | AGATGGTGCCAGCAATAGA |
| Sh-Scramble | CCGGGCGAACGATCGAGTAAACGGACTCGAGTCCGTTTACTCGATCGTTCGCTTTTTG | AATTCAAAAAGCGAACGATCGAGTAAACGGACTCGAGTCCGTTTACTCGATCGTTCGC |
| Sh-EZH2-1 | CCGGGGATGGTACTTTCATTGAAGACTCGAGTCTTCAATGAAAGTACCATCCTTTTTG | AATTCAAAAAGGATGGTACTTTCATTGAAGACTCGAGTCTTCAATGAAAGTACCATCC |
| Sh-EZH2-2 | CCGGGGTGAATGCCCTTGGTCAATACTCGAGTATTGACCAAGGGCATTCACCTTTTTG | AATTCAAAAAGGTGAATGCCCTTGGTCAATACTCGAGTATTGACCAAGGGCATTCACC |
| Sh-circ1 | CCGGCTACACAATGGTCAACTGCACTCGAGTGCAGTTGACCATTGTGTAGTTTTTG | AATTCAAAAACTACACAATGGTCAACTGCACTCGAGTGCAGTTGACCATTGTGTAG |
| Sh-circ2 | CCGGACAATGGTCAACTGCAACTTGCTCGAGCAAGTTGCAGTTGACCATTGTTTTTTG | AATTCAAAAAACAATGGTCAACTGCAACTTGCTCGAGCAAGTTGCAGTTGACCATTGT |
| GAPDH | GGAGCGAGATCCCTCCAAAAT | GGCTGTTGTCATACTTCTCATGG |
| KHDRBS3 | AAAAGTGGAGAAGCGAAGT | TCTGAACCACCATTCAAATA |
| FBN2 | GGGACCTATCATCACTGGA | ACATCGGTAGCTTGAGACA |
| PTPN13 | TTGAGGTTGAACTGGCTAA | TGAAAGGGTACACTGTGGG |
| CPNE8 | TGTATGACTGGGACCGAGAT | GTTGCCGTTTGATGCTGTA |
| VCAN | ACAGAAAGCCACAGTCCAA | CCCATGAATCCGTAGCATA |
| ENAH | TCGTGATAAACTGTGCCATTCC | TTGCTGCCAAAGTTGAGACC |
